# Supplementary material
Source: Springer Nature journal article supplement (https://www.springermedizin.de/resource/supplementary/12955_2014_1423_MOESM2_ESM.pdf/9559480)

Mapping Equation #1\*

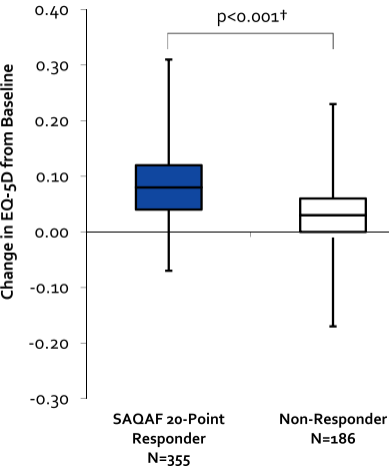

Mapping Equation #2#

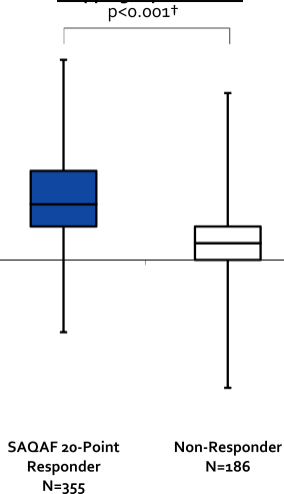

Supplement: MOESM2 [file 9559480]
